# Supplementary material
Source: PubMed Central journal article supplement (PMC3634674)
Supplement: supp_tpc.113.110106_tpc110106_SupplementalData.pdf [file supp_tpc.113.110106_tpc110106_SupplementalData.pdf]

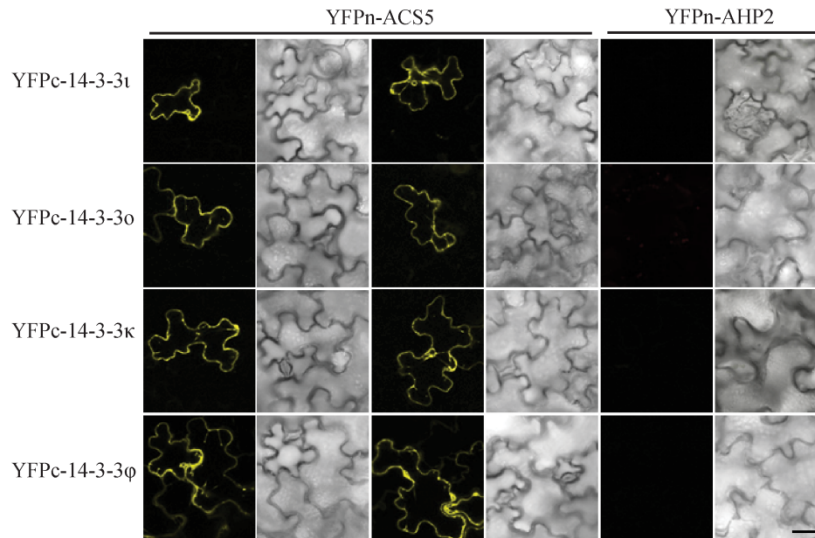

**Supplemental Figure 1. ACS5 interacts with multiple isoforms of 14-3-3.** Bimolecular fluorescence complementation (BiFC) of YFPc-ACS5 and four different isoforms of 14-3-3 (14-3-3 $\iota$ , 14-3-3 $\omicron$ , 14-3-3 $\kappa$ , 14-3-3 $\phi$ ) fused to YFPn in transiently transformed *Nicotiana benthamiana*. A plasmid expressing a mitochondrial cherry (mCherry) fluorescent marker was used as a transformation marker. Two representative images are shown for each interaction, along with a DIC image of the same cells. YFPn-AHP2 and YFPc-AHP2 were used as negative controls. The YFP signal was observed using confocal microscopy. Scale bar = 50  $\mu$ m.

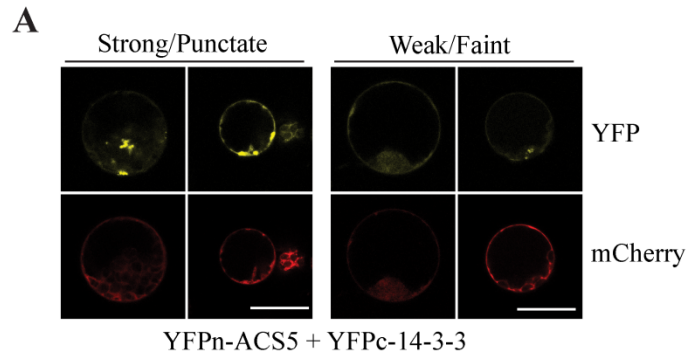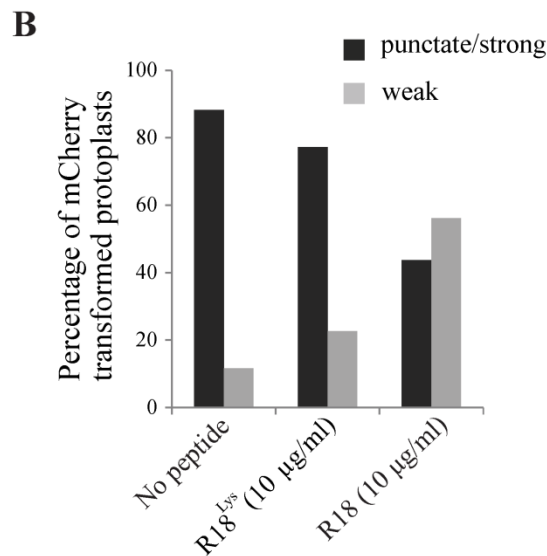

**Supplemental Figure 2. *In vivo* interaction between ACS5 and 14-3-3 $\omega$  in Arabidopsis protoplasts. A.** Classes of positive signals observed in ACS/14-3-3 BiFC interactions.

Protoplasts were co-transfected with plasmids expressing YFPn-ACS5, YFPc-14-3-3, and a mCherry fluorescent marker as a transformation marker. Two distinctive classes of BiFC interactions were observed. Most of protoplasts co-transfected with the mCherry marker generated strong, punctate YFP signals (left); a small fraction of the transformed protoplasts exhibited weak, faintly YFP positive signals (right). Scale bar = 20  $\mu$ m. **B.** Addition of R18 peptide reduces the interaction between ACS5 and 14-3-3 proteins. Protoplasts were co-

transfected with plasmids expressing YFPn-ACS5 and YFPc-14-3-3 and were incubated for 12 hours with either R18 or R18<sup>Lys</sup> peptide (10  $\mu$ g/ml). Black bars indicate the percentage of protoplasts showing strong/punctate YFP signals; grey bars those showing weak/faint YFP signals. N  $\geq$  70 per data point.

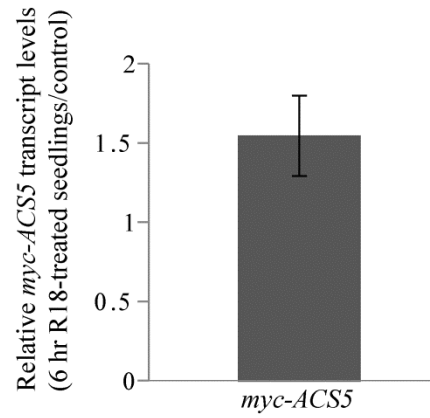

**Supplemental Figure 3. Real-time RT-PCR assay of *myc-ACS5* gene transcript in Arabidopsis seedlings in response to R18 peptide treatment.** The bar indicates the level of *myc-ACS5* transcript in the R18 treated sample relative to the non-treated sample. Mean  $\pm$  SE. Note that the *myc-ACS* transcript level is not decreased in response to R18 treatment.

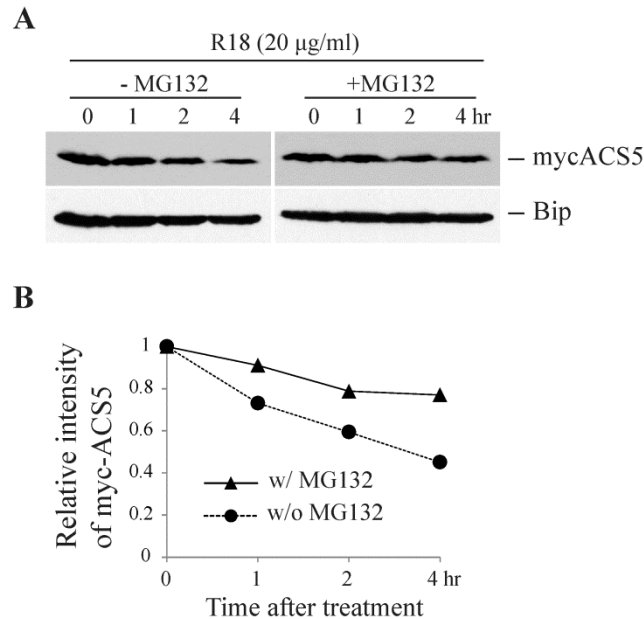

**Supplemental Figure 4. R18-mediated destabilization of myc-ACS5 protein is dependent on ubiquitin/26S proteasome activity.** **A.** Dark-grown Arabidopsis seedlings expressing myc-ACS5 protein were treated for various times as indicated with R18 peptide (20  $\mu$ g/ml) in the presence or absence of MG132 (50  $\mu$ M). Total protein extracts were used for immunoblotting using either an  $\alpha$ -myc or  $\alpha$ -BiP (loading control) antibody. **B.** Quantification of the relative intensity of myc-ACS5 bands from the protein blots in **A** using image J software. Intensity of myc-ACS5 bands were normalized to BiP control band intensity, and then these values normalized to the 0 time points, which were set to a value of 1.

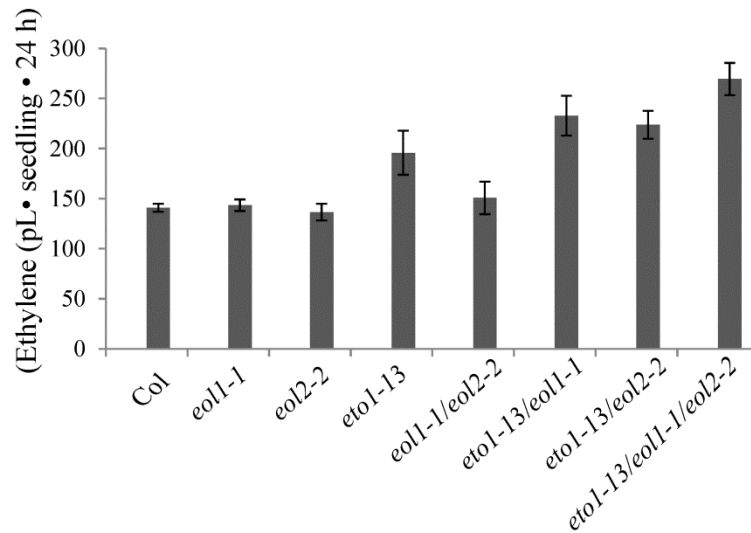

**Supplemental Figure 5. Ethylene production of light-grown wild-type and *eto1*, *eol1* and *eol2* mutant seedlings.** The indicated seedlings were grown in light for nine days in GC vials, capped further incubated for 24 h, and then ethylene was measured using gas chromatography as described in the methods. Mean  $\pm$  SE, N=3.

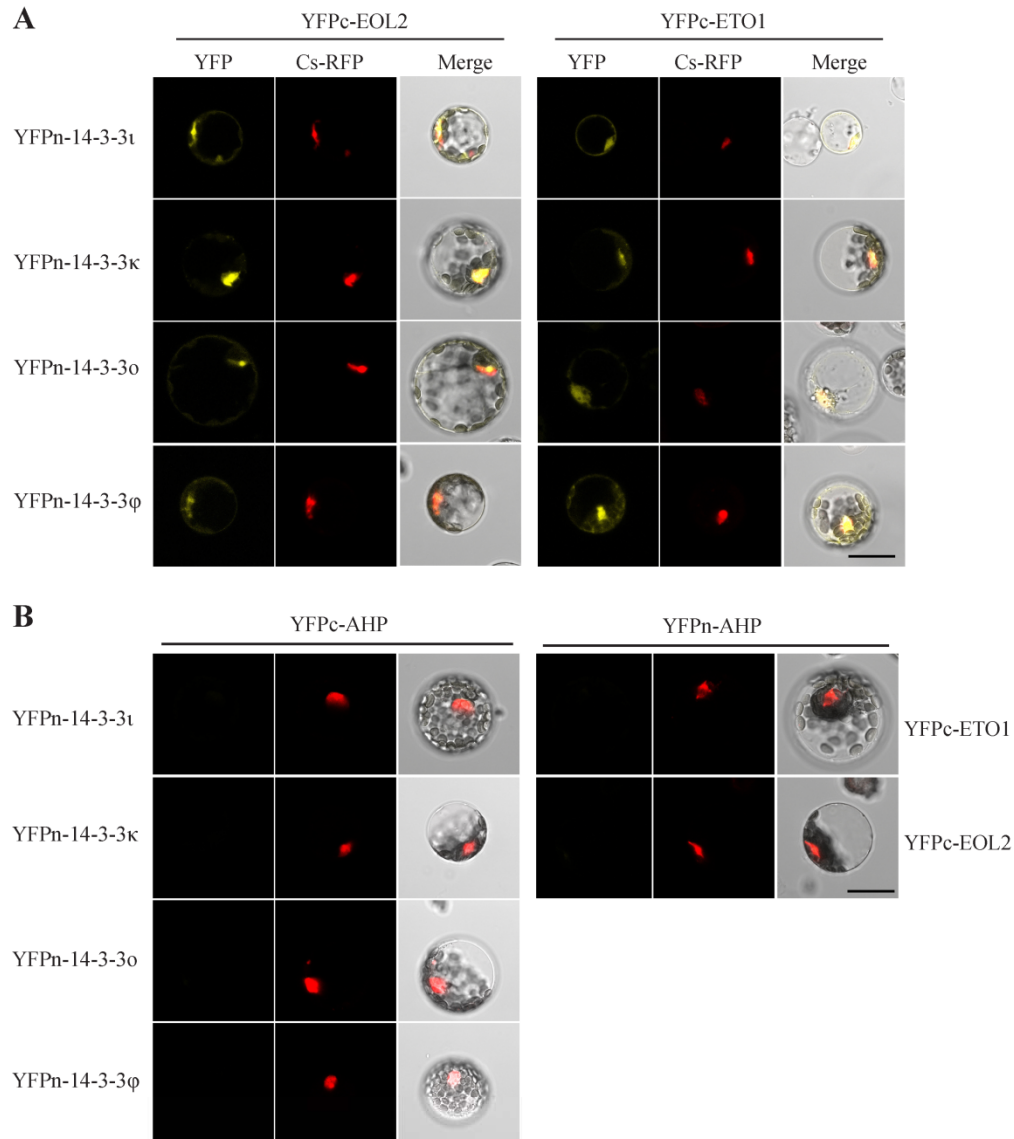

**Supplemental Figure 6. ETO1/EOL2 interacts with multiple isoforms of 14-3-3.** Plasmids expressing fusions of YFPc or YFPn to ETO1, EOL2 or four different isoforms of 14-3-3 (14-3-3 $\iota$ , 14-3-3 $\kappa$ , 14-3-3 $\omicron$ , 14-3-3 $\phi$ ) as indicated were transformed into Arabidopsis protoplasts. A plasmid expressing Cs-RFP was used as a transformation and nuclear marker. The protoplasts were imaged for the YFP (first set of panels) or RFP signals (second set of panels) using confocal microscopy. The third panel shows the RFP and YFP signals merged with a DIC image of the protoplasts. Plasmids expressing YFPc-AHP2 or YFPn-AHP2 fusion proteins were used as negative controls. Scale bar = 20  $\mu$ m.

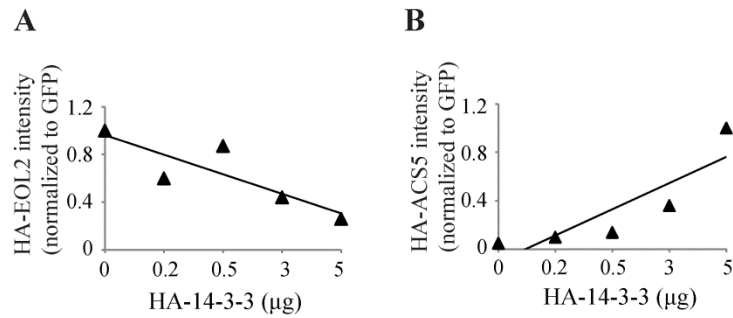

**Supplemental Figure 7. Quantification of the steady-state level of HA-EOL2 and HA-ACS5 proteins with increasing 14-3-3 expression using Image J.** The intensity of the HA-EOL2 and HA-ACS5 proteins in Figure 5A normalized to the intensity of the GFP bands in that sample, and then normalized to the value of the 0 (A) or 5  $\mu\text{g}$  (B) 14-3-3 expressing plasmid data points, which were set to 1.

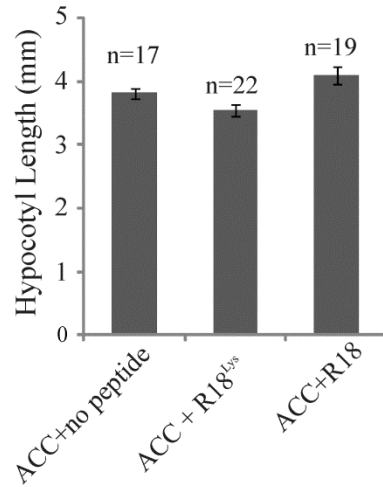

**Supplemental Figure 8. R18 does not affect the hypocotyl length of wild-type seedlings grown in the presence of ACC.** Wild-type seedlings were grown for three days in the dark on MS media supplemented with 10  $\mu$ M ACC in the presence of no peptide, 200  $\mu$ g/ml R18 or R18<sup>Lys</sup> peptide and the length of the hypocotyls measured. The mean (of n seedlings as indicated)  $\pm$  the SE is shown.



**Supplemental Table 1. List of primers used in this study****Constructs of entry clones**

| <b>Genes</b>      | <b>Primers</b> | <b>Sequences</b>                |
|-------------------|----------------|---------------------------------|
| 14-3-3 $\kappa$   | Kappa-F        | CACCATGGCGACGACCTTAAGCAG        |
|                   | Kappa-R        | TCAGGCCTCATCCATCTGCTC           |
| 14-3-3 $\phi$     | Phi-F          | CACCATGGCGGCACCACCAG            |
|                   | Phi-R          | TTAGATCTCCTTCTGTTCTTCAGCA       |
| 14-3-3 $\omicron$ | Omicron-F      | CACCATGGAGAACGAGAGAGCGAAG       |
|                   | Omicron-R      | TTAGATTTTGTTCACCTCATCTTGTTG     |
| 14-3-3 $\iota$    | Iota-F         | CACCATGTCATCATCAGGATCCGACA      |
|                   | Iota-R         | TCAGTTCTCAGTGGCATCGGCA          |
| 14-3-3 $\omega$   | Omega-F        | CACCATGGCGTCTGGGCGTG            |
|                   | Omega-R        | TCACTGCTGTTCCCTCGGTCG           |
| ACS6              | ACS6-F         | CACCATGGTGGCTTTTGCAACAGAG       |
|                   | ACS6-R         | TTAAGTCTGTGCACGGACTAGCG         |
| ACS7              | ACS7-F         | CACCATGGGTCTTCCTCTAATGATGGAG    |
|                   | ACS7-R         | TCAAAACCTCCTTCGTCGGT            |
| Ubiquitine3       | UBQ3-fwd       | CACCATGCAAATCTTTGTCAAGACTCTGACT |
|                   | UBQ3-Rev       | CTAACCACCTCTGAGACGAAGCAC        |

**RT PCR**

| <b>Gene</b> | <b>Primers</b> | <b>Sequences</b>         |
|-------------|----------------|--------------------------|
| myc-ACS5    | ACS5-RT-F      | CATAGCTGGTTTTTCGGCTAGACC |
|             | ACS5-RT-R      | ATGAAACAGCTTTCGACAAAAGTG |

**Supplemental Table 2. List of plasmids used in this study**

| <b>Constructs</b>          | <b>Plasmid type</b> | <b>Source</b>                 |
|----------------------------|---------------------|-------------------------------|
| pENTR-14-3-3 $\kappa$      | ENTRY clone         | U10251(ABRC)                  |
| pENTR-14-3-3 $\phi$        | ENTRY clone         | U12850(ABRC)                  |
| pENTR-14-3-3 $\sigma$      | ENTRY clone         | U86636(ABRC)                  |
| pENTR-14-3-3 $\iota$       | ENTRY clone         | U60580(ABRC)                  |
| pENTR-14-3-3 $\omega$      | ENTRY clone         | U21483(ABRC)                  |
| pENTR-ACS5                 | ENTRY clone         | Chae et al., (2003)           |
| pENTR-ACS5 <sup>eto2</sup> | ENTRY clone         | Chae et al., (2003)           |
| pENTR-ACS6                 | ENTRY clone         | This study                    |
| pENTR-ACS7                 | ENTRY clone         | This study                    |
| pENTR-AHP2                 | ENTRY clone         | To et al., (2007)             |
| pENTR-EOL2                 | ENTRY clone         | Christians et al., (2009)     |
| pENTR-ETO1                 | ENTRY clone         | Christians et al., (2009)     |
| pENTR-UBQ3                 | ENTRY clone         | This study                    |
| pCL112                     | Destination vector  | Bracha-Drori K, et al. (2004) |
| pCL113                     | Destination vector  | Bracha-Drori K, et al. (2004) |
| pEarleyGate 201            | Destination vector  | Earley et al., (2006)         |
| pEarleyGate 203            | Destination vector  | Earley et al., (2006)         |
| pEarleyGate 103            | Destination vector  | Earley et al., (2006)         |
| pEarleyGate 104            | Destination vector  | Earley et al., (2006)         |
| pTA7002-DEX-GW             | Destination vector  | This study                    |
| pMDC7-GW-myc               | Destination vector  | This study                    |

**Supplemental Figure 3. List of GATEWAY constructs used in this study**

| <b>Constructs</b>         | <b>Entry vector</b>        | <b>Destination vector</b> |
|---------------------------|----------------------------|---------------------------|
| YFPn-ACS5                 | pENTR-ACS5                 | pCL112                    |
| YFPn-ACS6                 | pENTR-ACS6                 | pCL112                    |
| YFPn-ACS7                 | pENTR-ACS7                 | pCL112                    |
| YFPn-ACS5 <sup>eto2</sup> | pENTR-ACS5 <sup>eto2</sup> | pCL112                    |
| YFPn-AHP2                 | pENTR-AHP2                 | pCL112                    |
| YFPc-AHP2                 | pENTR-AHP2                 | pCL113                    |
| 14-3-3 $\kappa$ -YFPc     | pENTR-14-3-3 $\kappa$      | pCL113                    |
| 14-3-3 $\omicron$ -YFPc   | pENTR-14-3-3 $\omicron$    | pCL113                    |
| 14-3-3 $\iota$ -YFPc      | pENTR-14-3-3 $\iota$       | pCL113                    |
| 14-3-3 $\phi$ -YFPc       | pENTR-14-3-3 $\phi$        | pCL113                    |
| 14-3-3 $\omega$ -YFPc     | pENTR-14-3-3 $\omega$      | pCL113                    |
| YFP-14-3-3                | pENTR-14-3-3 $\omega$      | pEarleyGate 104           |
| EOL2-GFP                  | pENTR-EOL2                 | pEarleyGate 103           |
| myc-ACS5                  | pENTR-ACS5                 | pEarleyGate 203           |
| HA-ACS5                   | pENTR-ACS5                 | pEarleyGate 201           |
| HA-14-3-3                 | pENTR-14-3-3 $\omega$      | pEarleyGate 201           |
| HA-EOL2                   | pENTR-EOL2                 | pEarleyGate 201           |
| HA-ETO1                   | pENTR-ETO1                 | pEarleyGate 201           |
| HA-UBQ3                   | pENTR-UBQ3                 | pEarleyGate 201           |
| p35S:myc-ACS7             | pENTR-ACS7                 | pTA7002-DEX-GW            |
| p35S:14-3-3-myc           | pENTR-14-3-3 $\omega$      | pMDC7-GW-myc              |
| p35S:HA-EOL2              | pENTR-EOL2                 | pEarleyGate 201           |

## **Supplemental Method 1**

### **Quantitative RT-PCR Analysis**

Total RNA was extracted from 3-d-old dark-grown *Arabidopsis* seedlings using the RNeasy plus kit (Qiagen). The first-strand cDNA was synthesized from the total RNA using Superscript III reverse transcriptase (Invitrogen) as described by the manufacturer. Quantitative RT-PCR analyses were performed using a SYBR Green premix Ex Taq polymerase (Takara) in a DNA Engine OPTICON 2 (MJ Research) with primers mentioned in Supplemental Table 1. The conditions for PCR amplification were as follows: 94°C for 2 min; 40 cycles of 94°C for 15 s; 58°C for 15 s and 72°C for 15 s. The relative expression for myc-ACS5 in R18 treated seedling expressing myc-ACS5 protein (normalized to b-tubulin as reference gene and to untreated seedling was used to as an internal reference gene) and standard errors were determined using REST 2009 software (Qiagen).

## References

- Bracha-Drori K, Shichrur K, Katz A, Oliva M, Angelovici R, Yalovsky S, Ohad N.** (2004) Detection of protein-protein interactions in plants using bimolecular fluorescence complementation. *Plant Journal*. 40(3), 419-427.
- Chae, H.S., Faure, F., and Kieber, J.J.** (2003). The *eto1*, *eto2* and *eto3* mutations and cytokinin treatment elevate ethylene biosynthesis in Arabidopsis by increasing the stability of the ACS5 protein. *Plant Cell* **15**, 545-559.
- Christians, M.J., Gingerich, D.J., Hansen, M., Binder, B.M., Kieber, J.J., and Vierstra, R.D** (2009). The BTB ubiquitin ligases ETO1, EOL1 and EOL2 act collectively to regulate ethylene biosynthesis in Arabidopsis by controlling type-2 ACC synthase levels. *Plant J.* **57**, 332-345.
- Earley KW, Haag JR, Pontes O, Opper K, Juehne T, Song K, Pikaard CS.** (2006). Gateway-compatible vectors for plant functional genomics and proteomics. *Plant Journal* 45(4), 616-629
- To JP, Deruère J, Maxwell BB, Morris VF, Hutchison CE, Ferreira FJ, Schaller GE, Kieber JJ.** (2007). Cytokinin regulates type-A Arabidopsis Response Regulator activity and protein stability vis two-component phosphorelay. *Plant Cell*. 19(12), 3901-3914.
